# Supplementary material for: Magnetically separable triazine-based Cu(ii)–vitamin B5 complex in nitromethane toward efficient heterogeneous cyanation reaction of aryl halides
Source: Royal Society of Chemistry journal article supplement (doi:10.1039/d2ra06104j), 2023-01-01
Supplement: d2ra06104j1.pdf [file d2ra06104j1.pdf]

## Magnetically separable triazine-based Cu(II)-vitamin B<sub>5</sub> complex in nitromethane toward efficient heterogeneous cyanation reaction of aryl halides

Farzaneh Karimi<sup>‡a</sup>, Masoumeh Jadidi Nejad<sup>‡a</sup>, Arefe Salamatmanesh<sup>‡a</sup> and Akbar Heydari<sup>\*a</sup>

<sup>a</sup>Chemistry Department, Tarbiat Modares University, P.O. Box 14155-4838, Tehran, Iran.

\*E-mail: heydar\_a@modares.ac.ir; Fax: +98-21-82883455; Tel: +98-21-82883444.

<sup>‡</sup> These authors contributed equally.

### Table of contents

|                                                                                       |            |
|---------------------------------------------------------------------------------------|------------|
| <b>1. Characterization of aryl nitrile derivatives</b>                                | <b>S1</b>  |
| <b>2. <sup>1</sup>H NMR TCT/B<sub>5</sub></b>                                         | <b>S3</b>  |
| <b>3. <sup>1</sup>H NMR and <sup>13</sup>CNMR spectra of aryl nitrile derivatives</b> | <b>S4</b>  |
| <b>4. References</b>                                                                  | <b>S20</b> |

### Characterization of aryl nitrile derivatives:

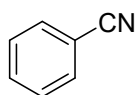

Benzonitrile (2a). Colorless oil; <sup>1</sup>H NMR (499 MHz, DMSO-*d*<sub>6</sub>) δ 7.80 (d, *J* = 7.6 Hz, 2H), 7.71 – 7.68 (m, 1H), 7.55 (t, *J* = 7.6 Hz, 2H); <sup>13</sup>C NMR (126 MHz, DMSO-*d*<sub>6</sub>) δ 132.64, 131.17, 128.80, 118.60, 112.66. HRMS (ESI): Calcd for C<sub>7</sub>H<sub>5</sub>N (M + H)<sup>+</sup> 103.04, found 103.10.

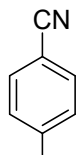

4-Aminobenzonitrile (2d). White solid, mp 83-85 ° C; <sup>1</sup>H NMR (499 MHz, DMSO-*d*<sub>6</sub>) δ 7.36 (d, *J* = 8.1 Hz, 2H), 6.59 (d, *J* = 8.2 Hz, 2H), 6.11 (s, 2H); <sup>13</sup>C NMR (126 MHz, DMSO-*d*<sub>6</sub>) δ 150.98, 133.14, 118.42, 114.65, 98.61. HRMS (ESI): Calcd for C<sub>7</sub>H<sub>6</sub>N<sub>2</sub> (M + H)<sup>+</sup> 118.05, found 118.10.

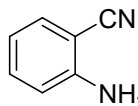

2-Aminobenzonitrile (2f). Beige-brown solid, mp 49-50 ° C;  $^1\text{H}$  NMR (499 MHz, DMSO- $d_6$ )  $\delta$  7.35 (d,  $J$  = 7.9 Hz, 1H), 7.28 (t,  $J$  = 7.5 Hz, 1H), 6.76 (d,  $J$  = 8.5 Hz, 1H), 6.57 (t,  $J$  = 7.5 Hz, 1H), 5.98 (s, 2H);  $^{13}\text{C}$  NMR (126 MHz, DMSO- $d_6$ )  $\delta$  151.11, 133.59, 13.94, 118.02, 116.74, 94.30, 115.05. HRMS (ESI): Calcd for  $\text{C}_7\text{H}_6\text{N}_2$  (M +H) $^+$  118.05, found 118.10.

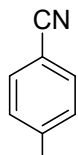

4-Nitrobenzonitrile (2h). Yellow solid, mp 147-149 ° C;  $^1\text{H}$  NMR (499 MHz, DMSO- $d_6$ )  $\delta$  8.37 (d,  $J$  = 8.3 Hz, 2H), 8.16 (d,  $J$  = 8.3 Hz, 2H);  $^{13}\text{C}$  NMR (126 MHz, DMSO- $d_6$ )  $\delta$  15.01, 133.80, 123.92, 117.93, 117.07. HRMS (ESI): Calcd for  $\text{C}_7\text{H}_4\text{N}_2\text{O}_2$  (M +H) $^+$  148.03, found 148.10.

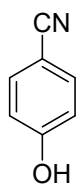

4-Hydroxybenzonitrile (2i). White solid, mp 110-112 ° C;  $^1\text{H}$  NMR (499 MHz, DMSO- $d_6$ )  $\delta$  10.59 (s, 1H), 7.59 (d,  $J$  = 8.2 Hz, 2H), 6.88 (d,  $J$  = 8.3 Hz, 2H);  $^{13}\text{C}$  NMR (126 MHz, DMSO- $d_6$ )  $\delta$  161.81, 134.20, 118.55, 116.26, 102.34. HRMS (ESI): Calcd for  $\text{C}_7\text{H}_5\text{NO}$  (M +H) $^+$  119.04, found 119.20.

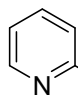

Picolinonitrile (2j). White solid, mp 28-30 ° C;  $^1\text{H}$  NMR (499 MHz, DMSO- $d_6$ )  $\delta$  8.75 (d,  $J$  = 4.8 Hz, 1H), 8.07 – 8.01 (m, 2H), 7.73 (t,  $J$  = 6.1 Hz, 1H);  $^{13}\text{C}$  NMR (126 MHz, DMSO- $d_6$ )  $\delta$  151.37, 138.00, 133.98, 128.20, 127.66, 117.32. HRMS (ESI): Calcd for  $\text{C}_6\text{H}_4\text{N}_2$  (M +H) $^+$  104.04, found 104.10.

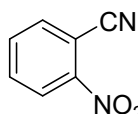

2-Nitrobenzonitrile (2k). Yellow solid, mp 109-110 ° C;  $^1\text{H}$  NMR (499 MHz, DMSO- $d_6$ )  $\delta$  8.42 – 8.35 (m, 1H), 8.17 (dd,  $J$  = 5.7, 3.4 Hz, 1H), 7.98 (dd,  $J$  = 6.0, 3.4 Hz, 2H);  $^{13}\text{C}$  NMR (126 MHz, DMSO- $d_6$ )  $\delta$  149.39, 135.51, 134.36, 133.83, 124.14, 115.13, 107.96. HRMS (ESI): Calcd for  $\text{C}_7\text{H}_4\text{N}_2\text{O}_2$  (M +H) $^+$  148.03, found 148.10.

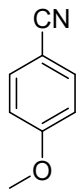

4-Methoxybenzotrile (2m). White solid, mp 60-61 ° C; <sup>1</sup>H NMR (499 MHz, DMSO-*d*<sub>6</sub>) δ 7.76 (d, *J* = 8.6 Hz, 2H), 7.09 (d, *J* = 8.6 Hz, 2H), 3.83 (s, 3H); <sup>13</sup>C NMR (126 MHz, DMSO-*d*<sub>6</sub>) δ 163.10, 133.88, 118.55, 114.22, 104.08, 55.32.. HRMS (ESI): Calcd for C<sub>13</sub>H<sub>13</sub>N<sub>2</sub>O (M +H)<sup>+</sup> 133.05, found 133.10.

### <sup>1</sup>H NMR of TCT/B<sub>5</sub>

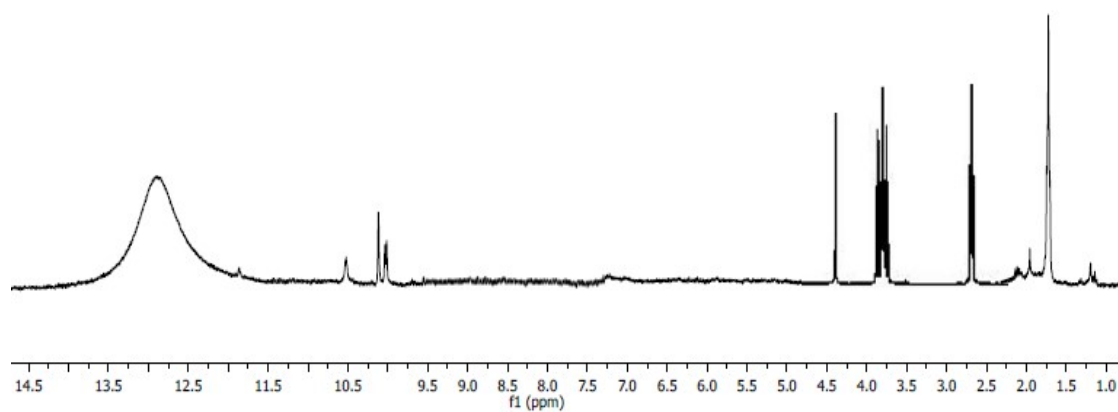

**$^1\text{H}$  NMR and  $^{13}\text{C}$  NMR spectra of aryl nitrile derivatives:**

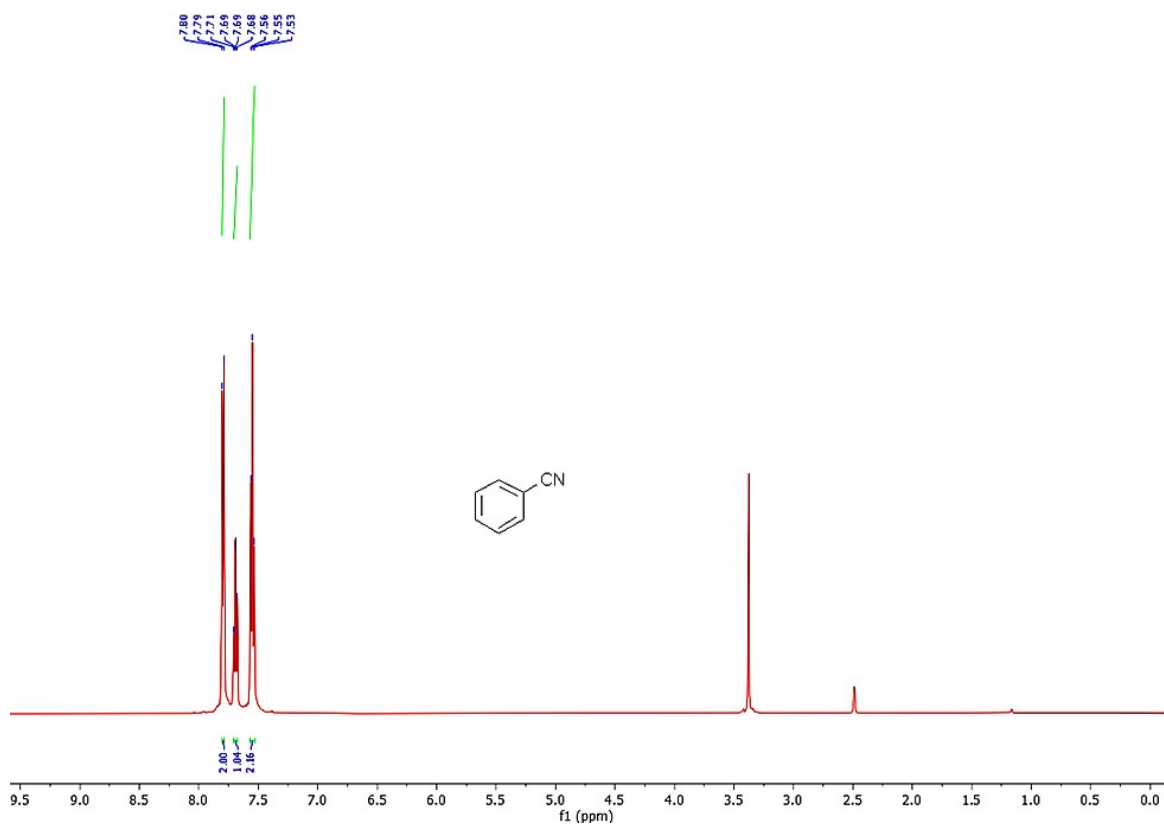

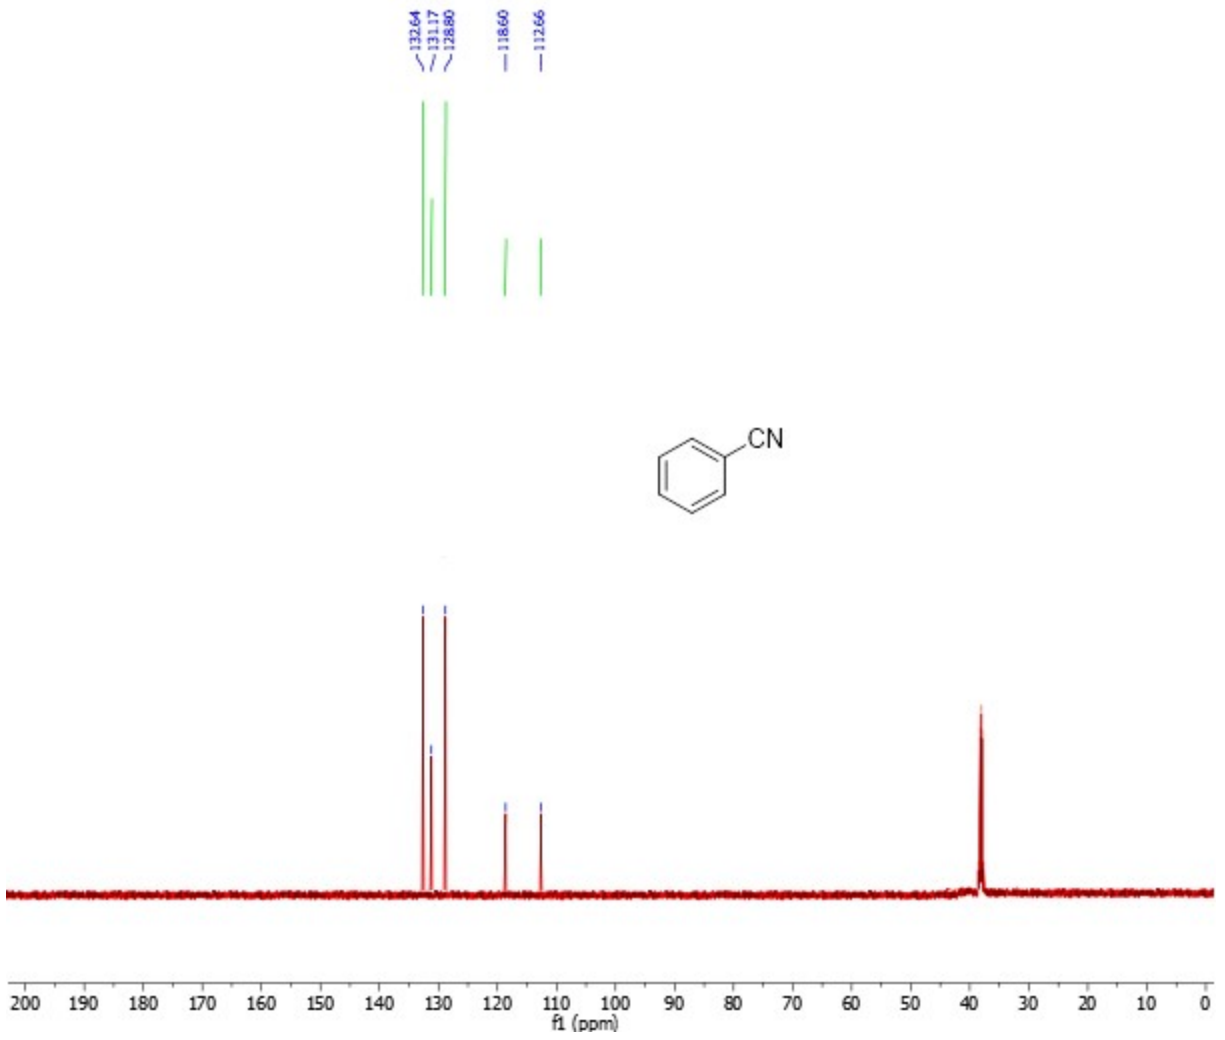

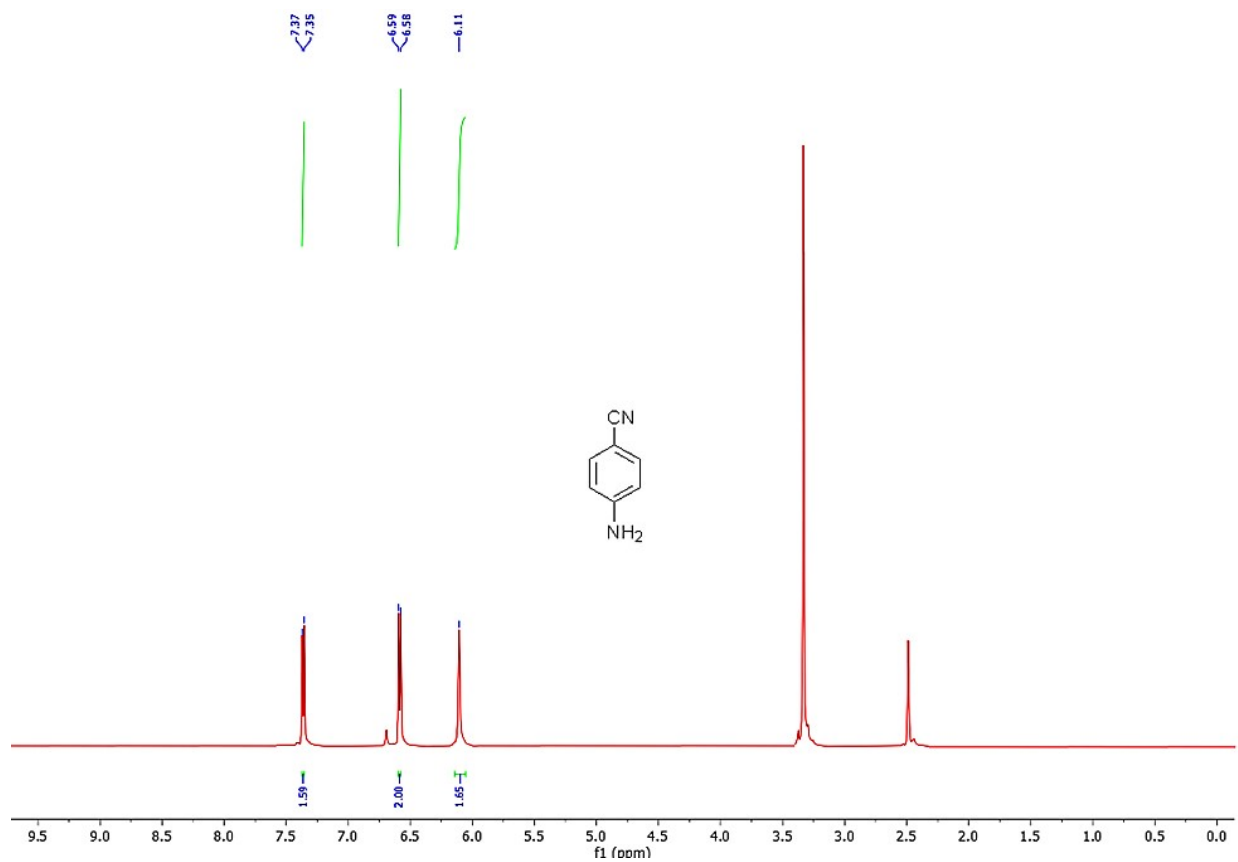

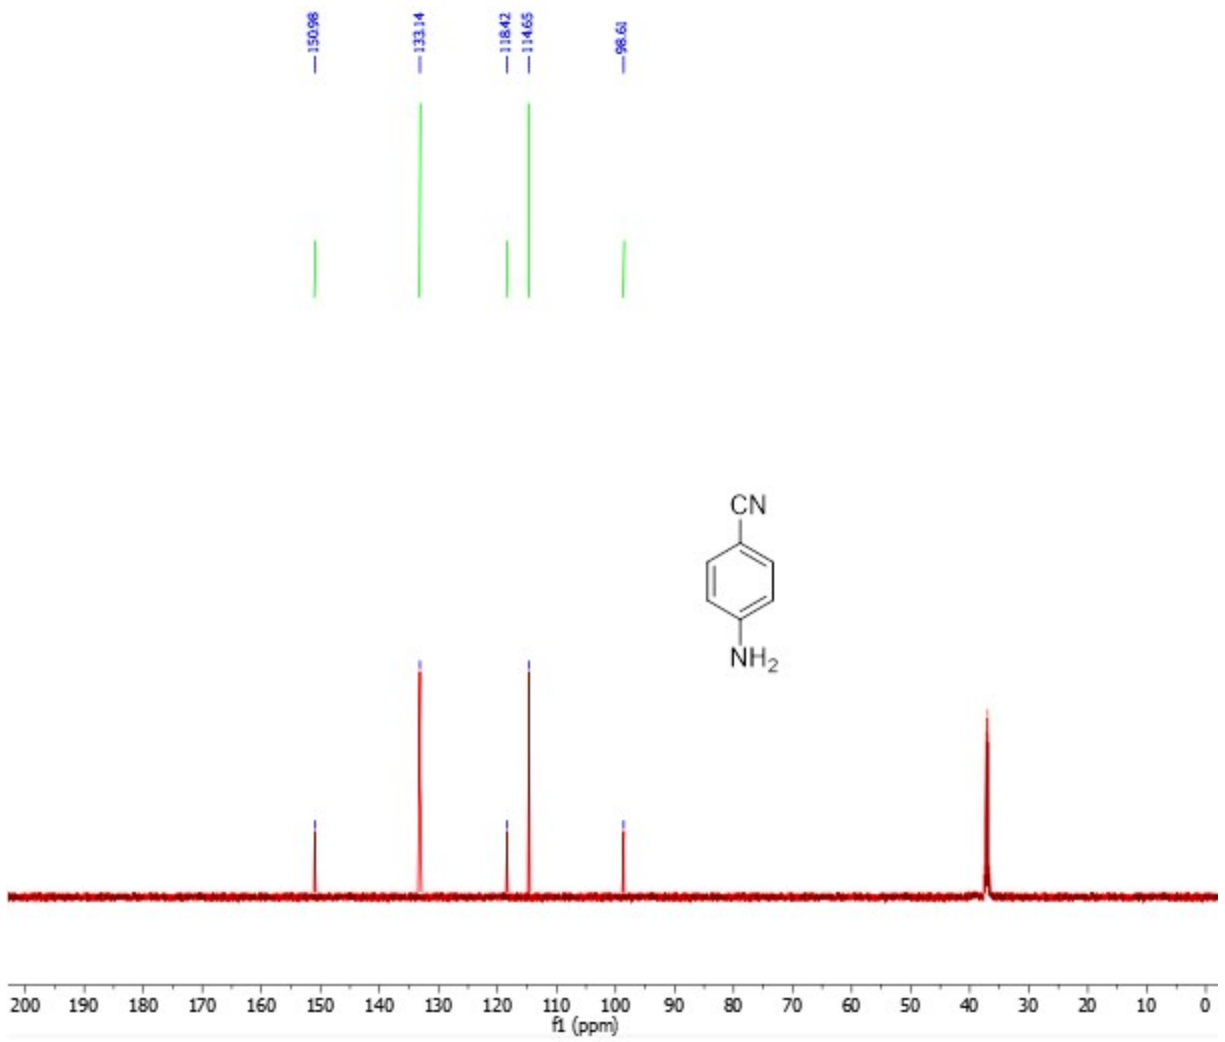

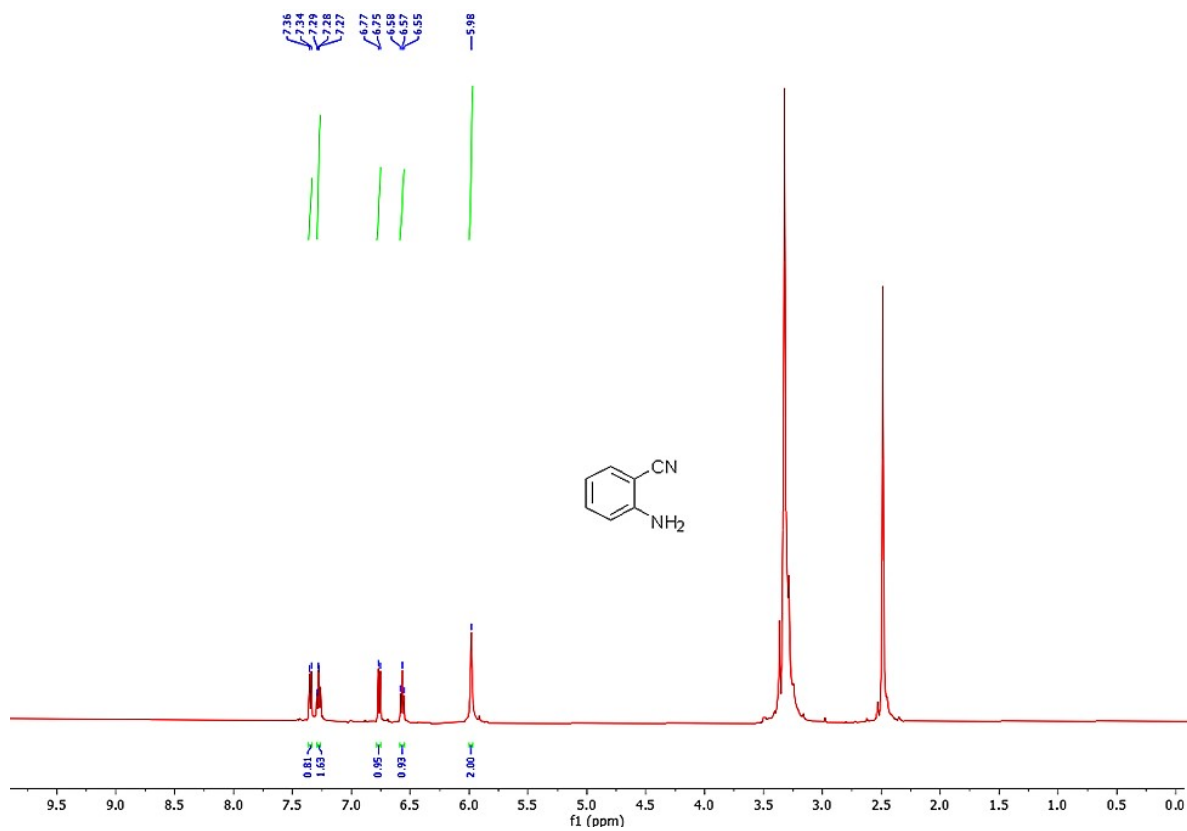



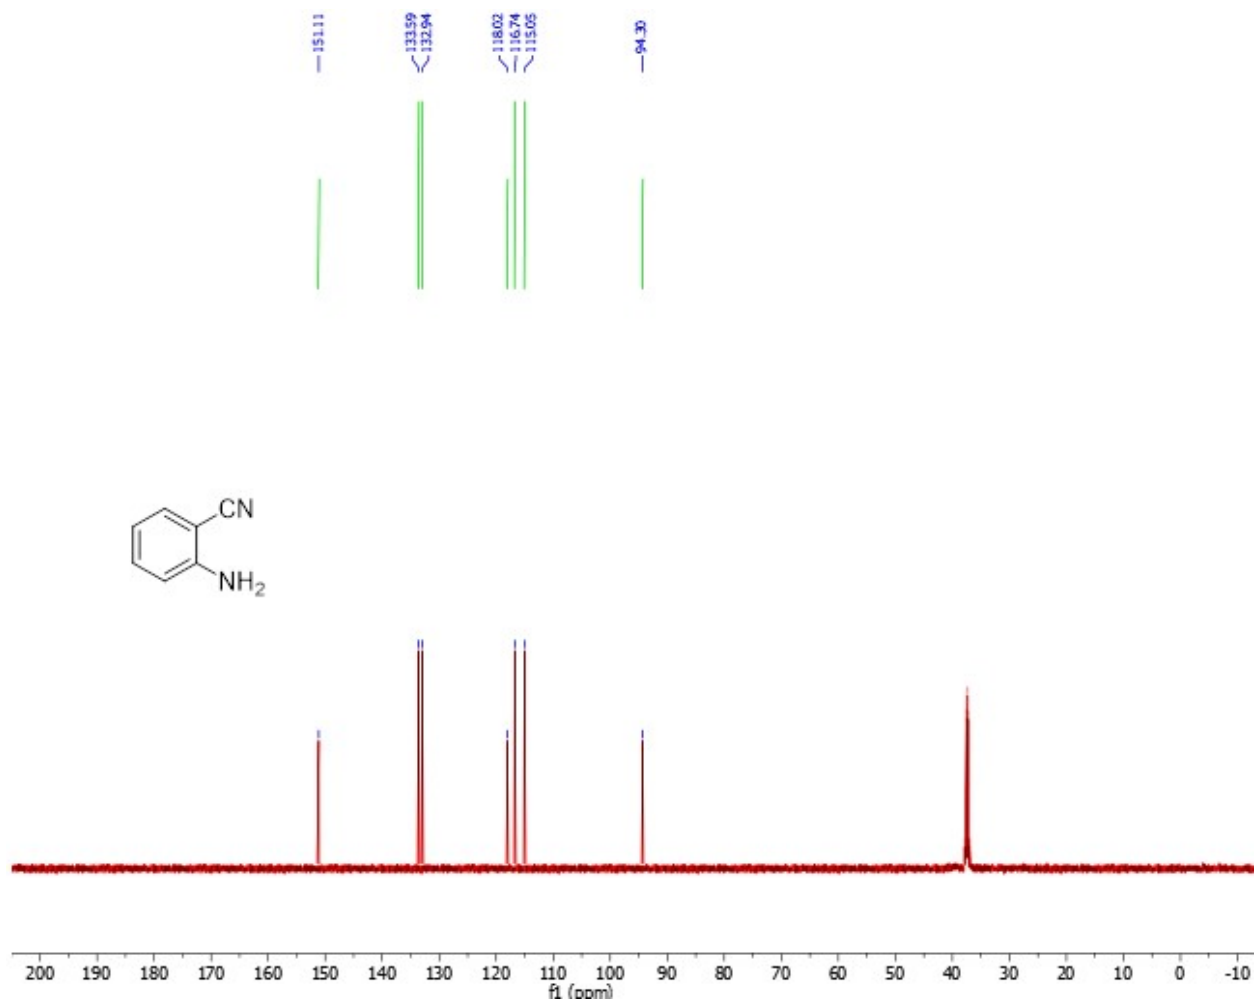

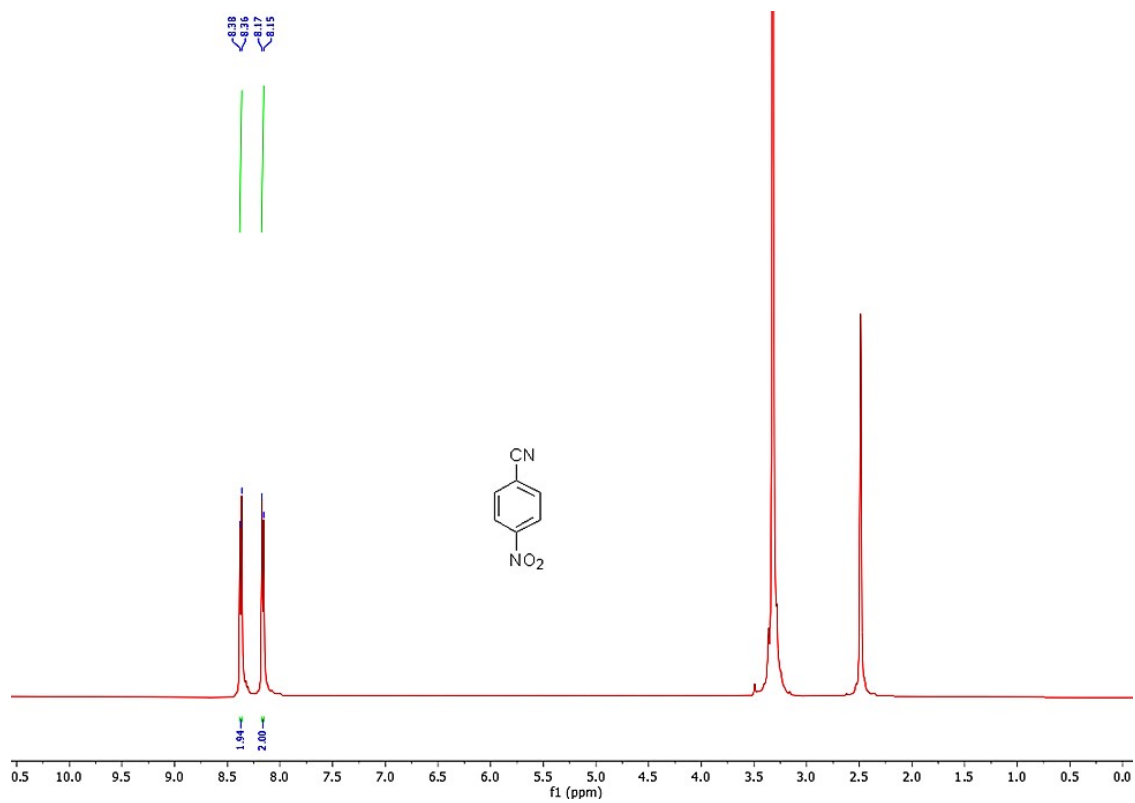

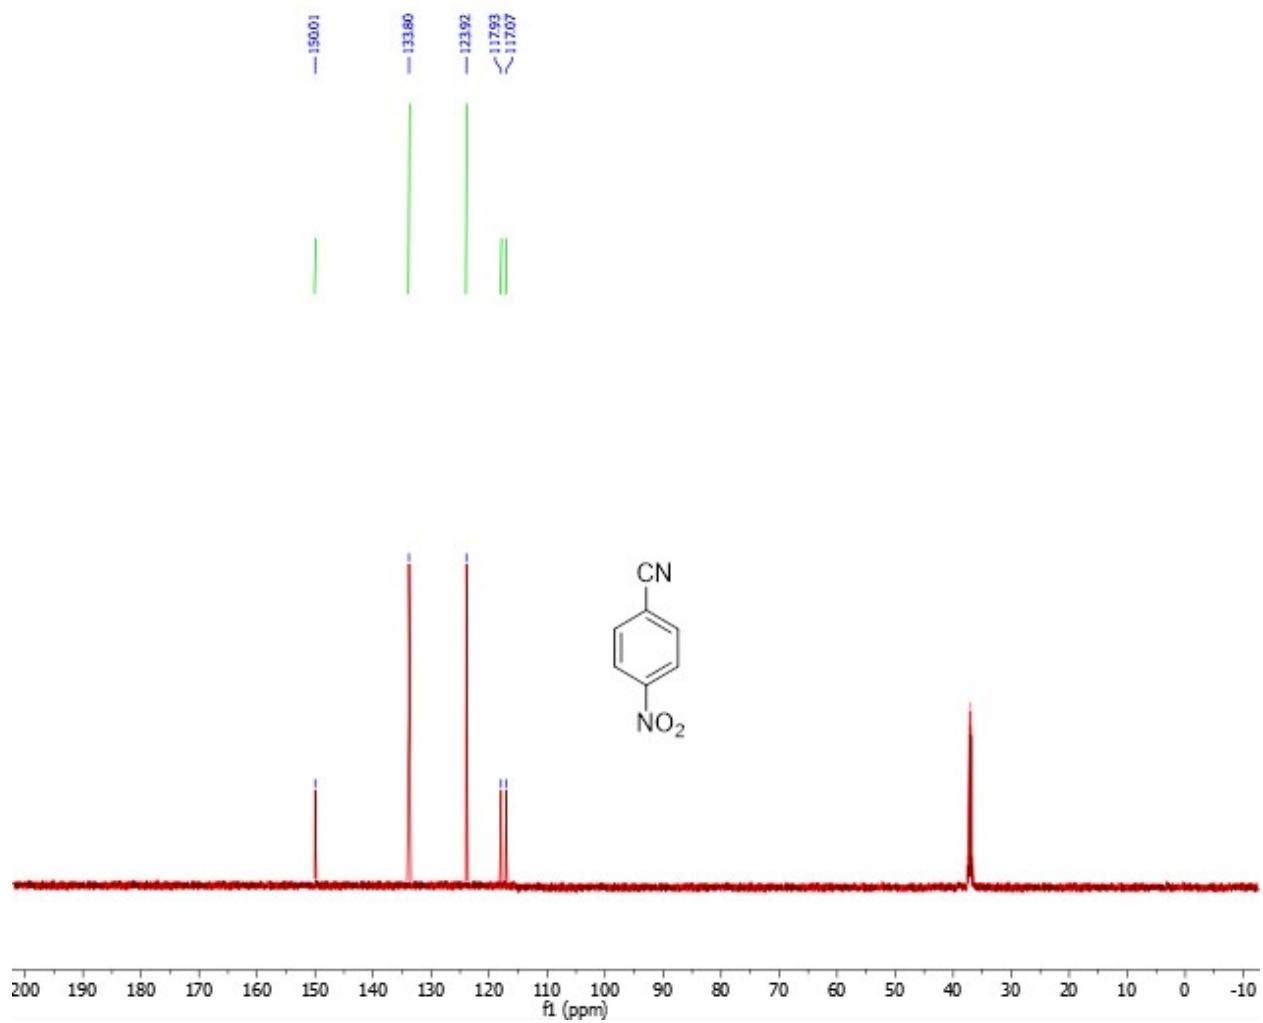

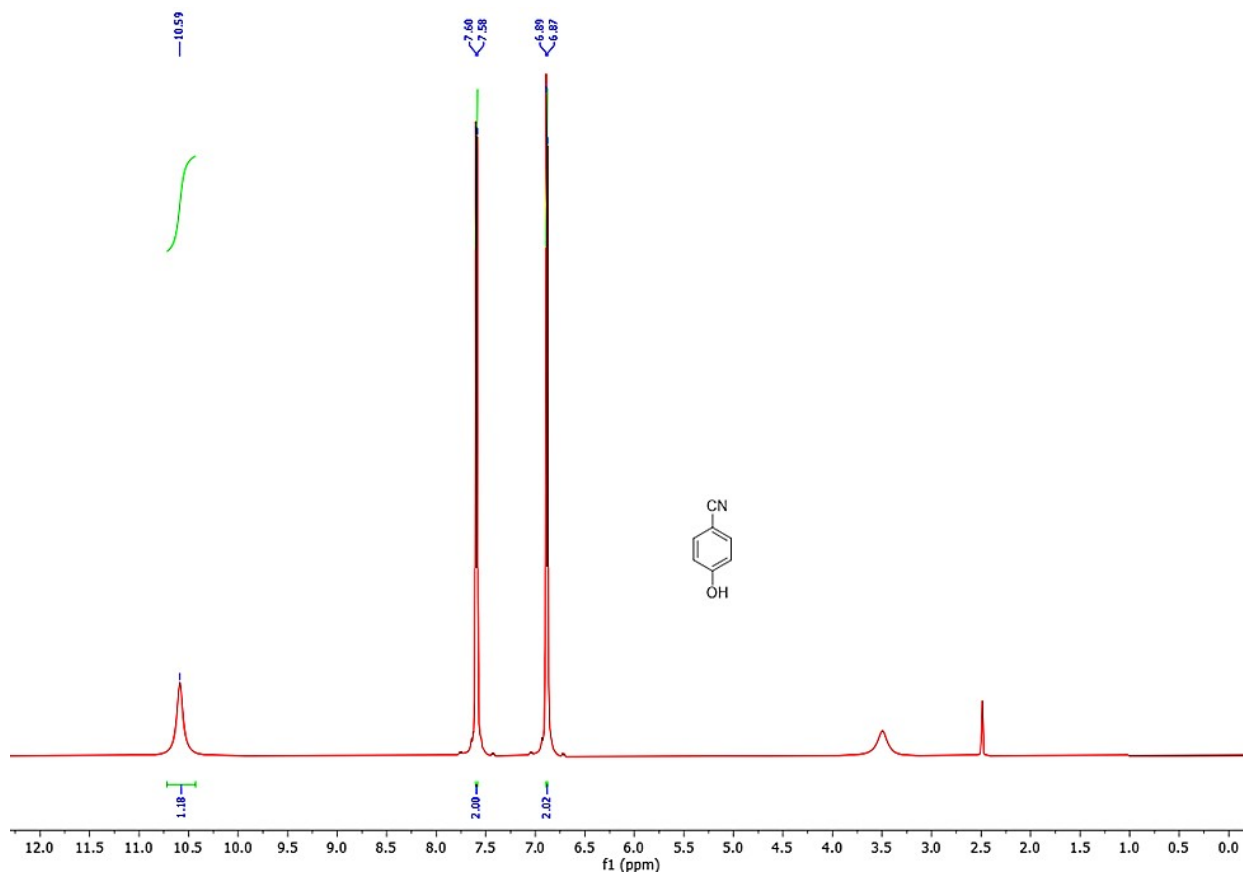

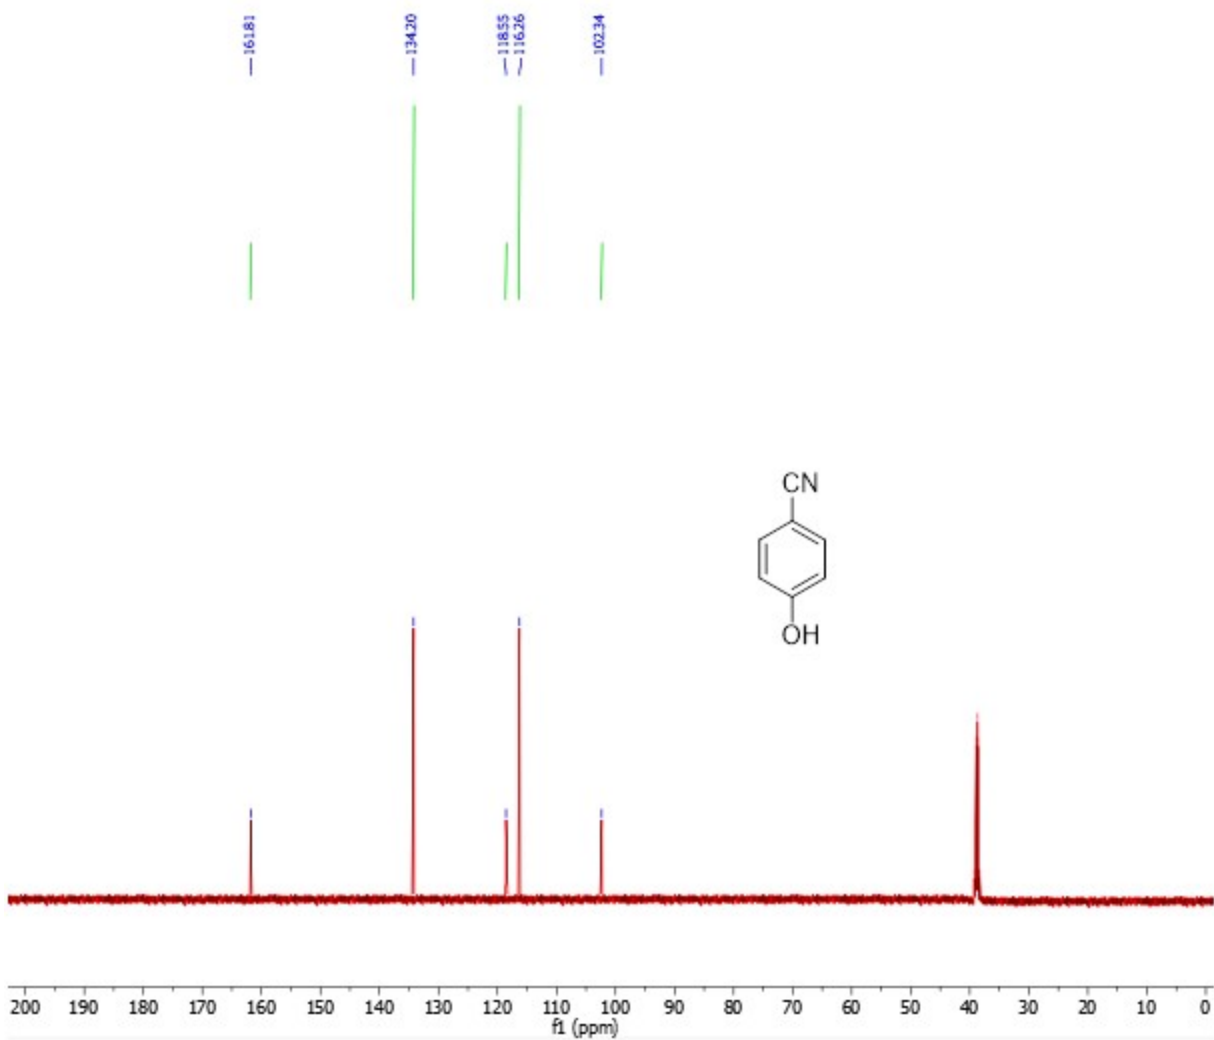

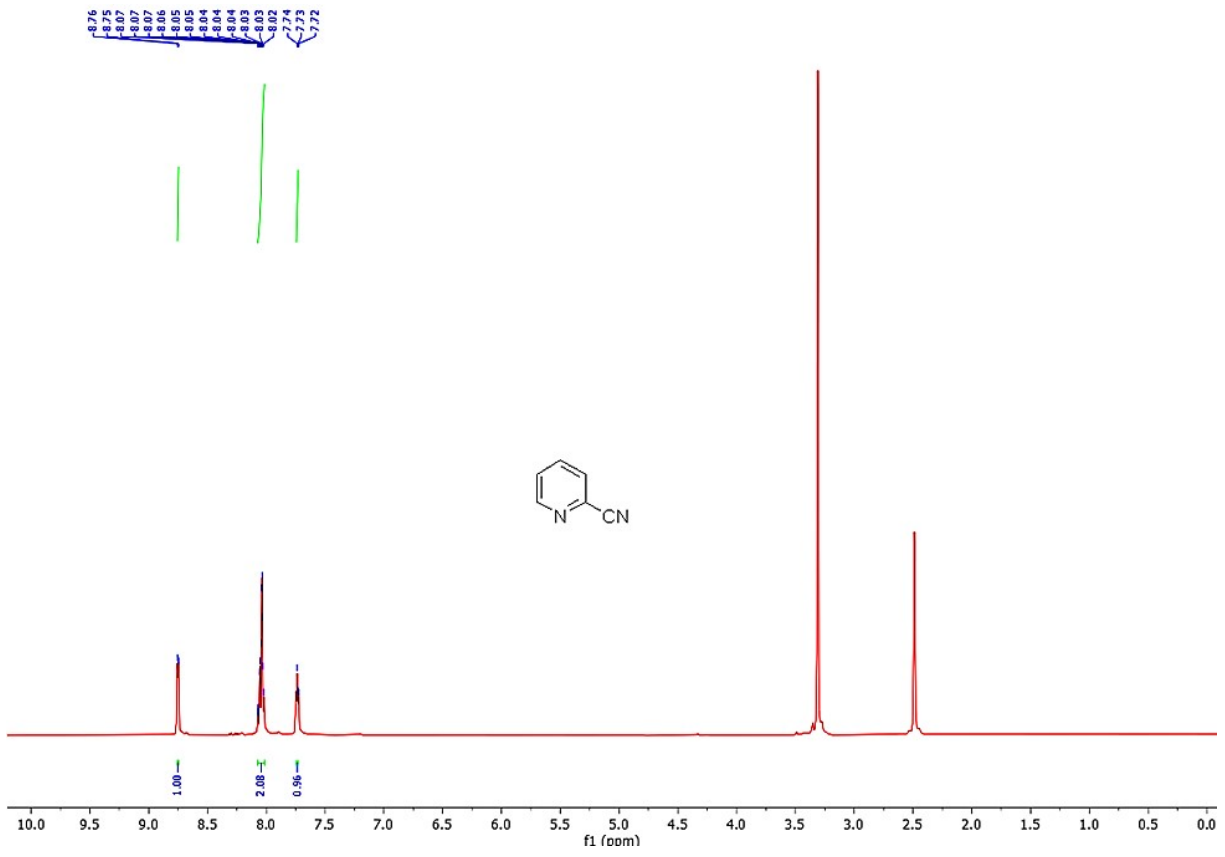

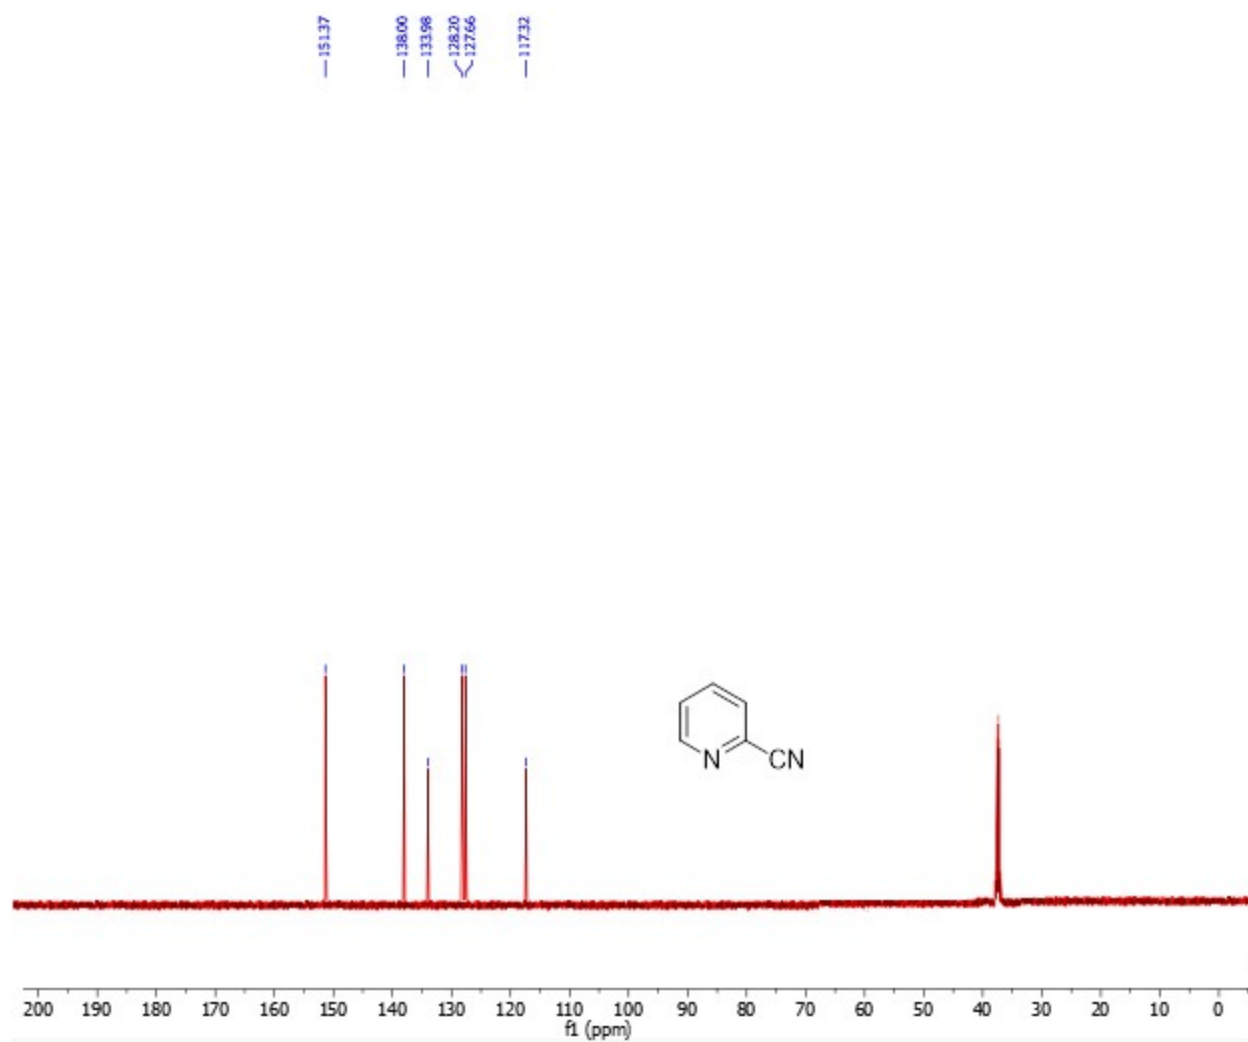

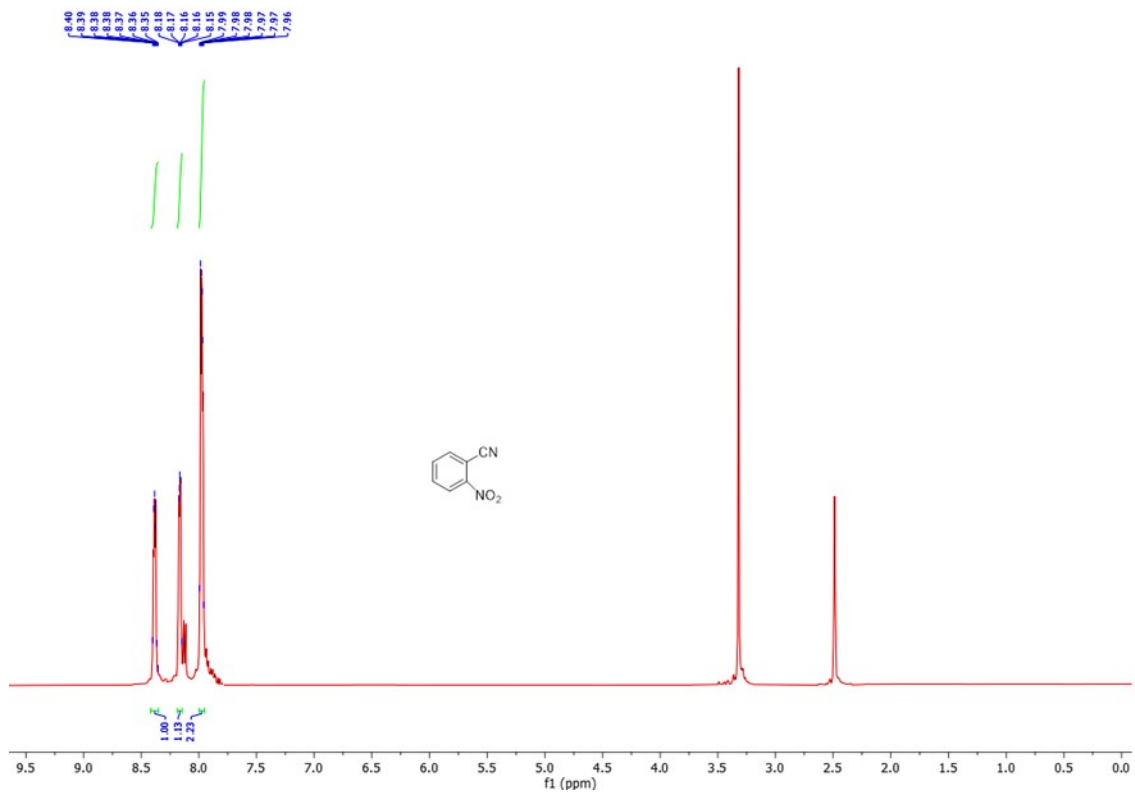



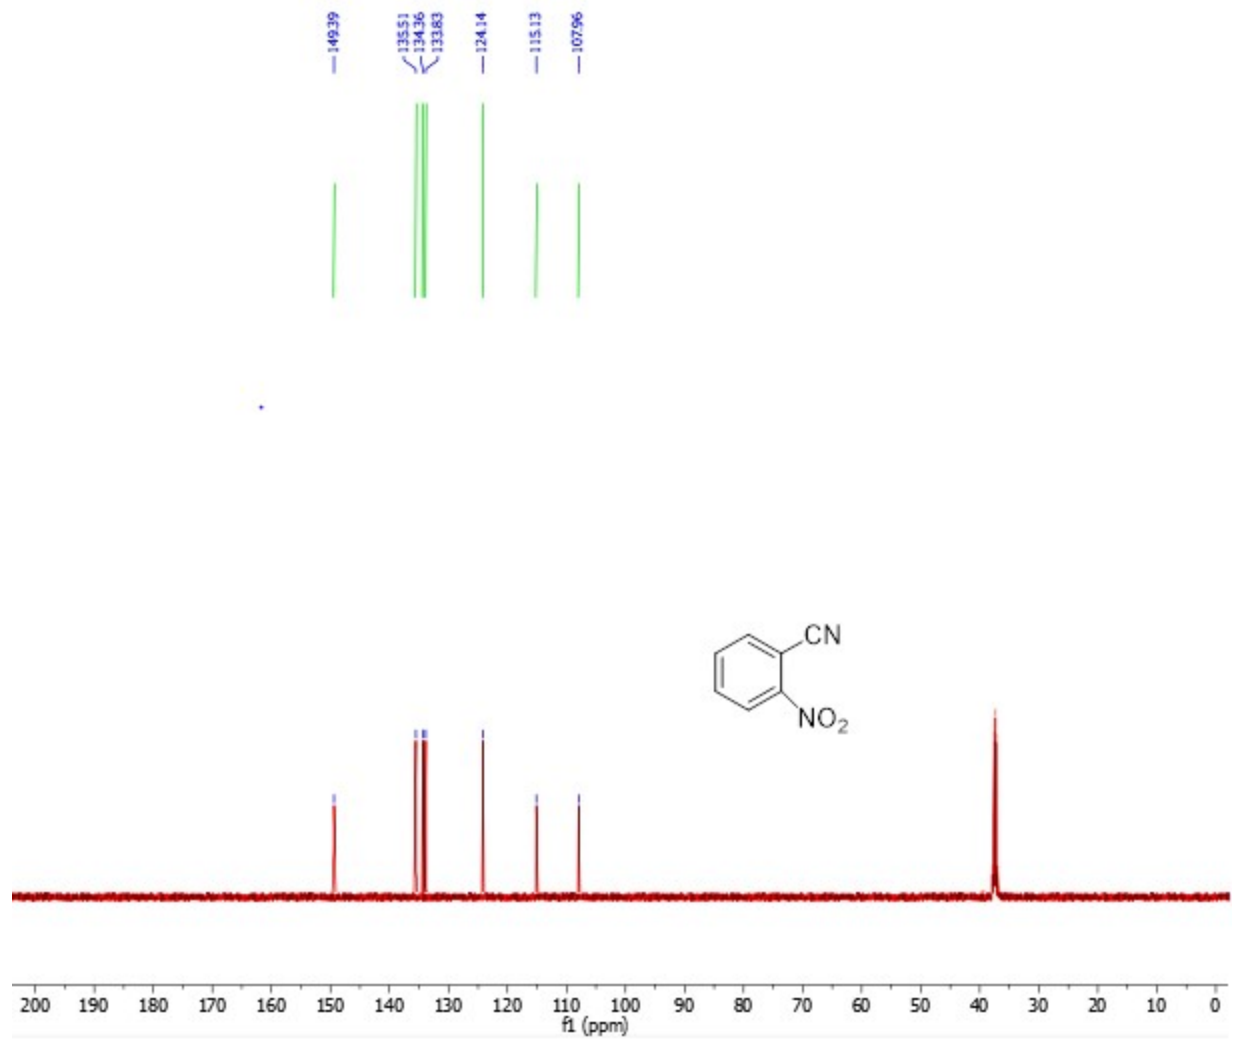

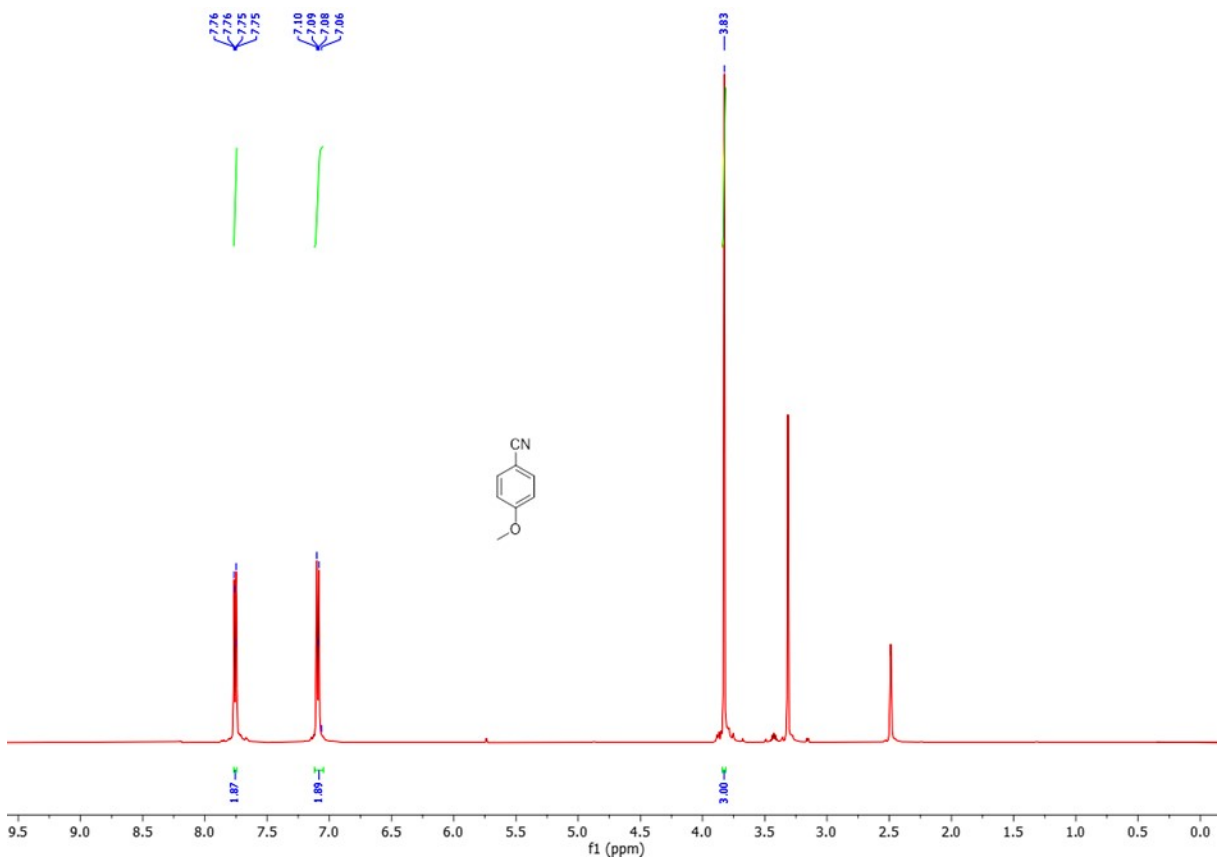

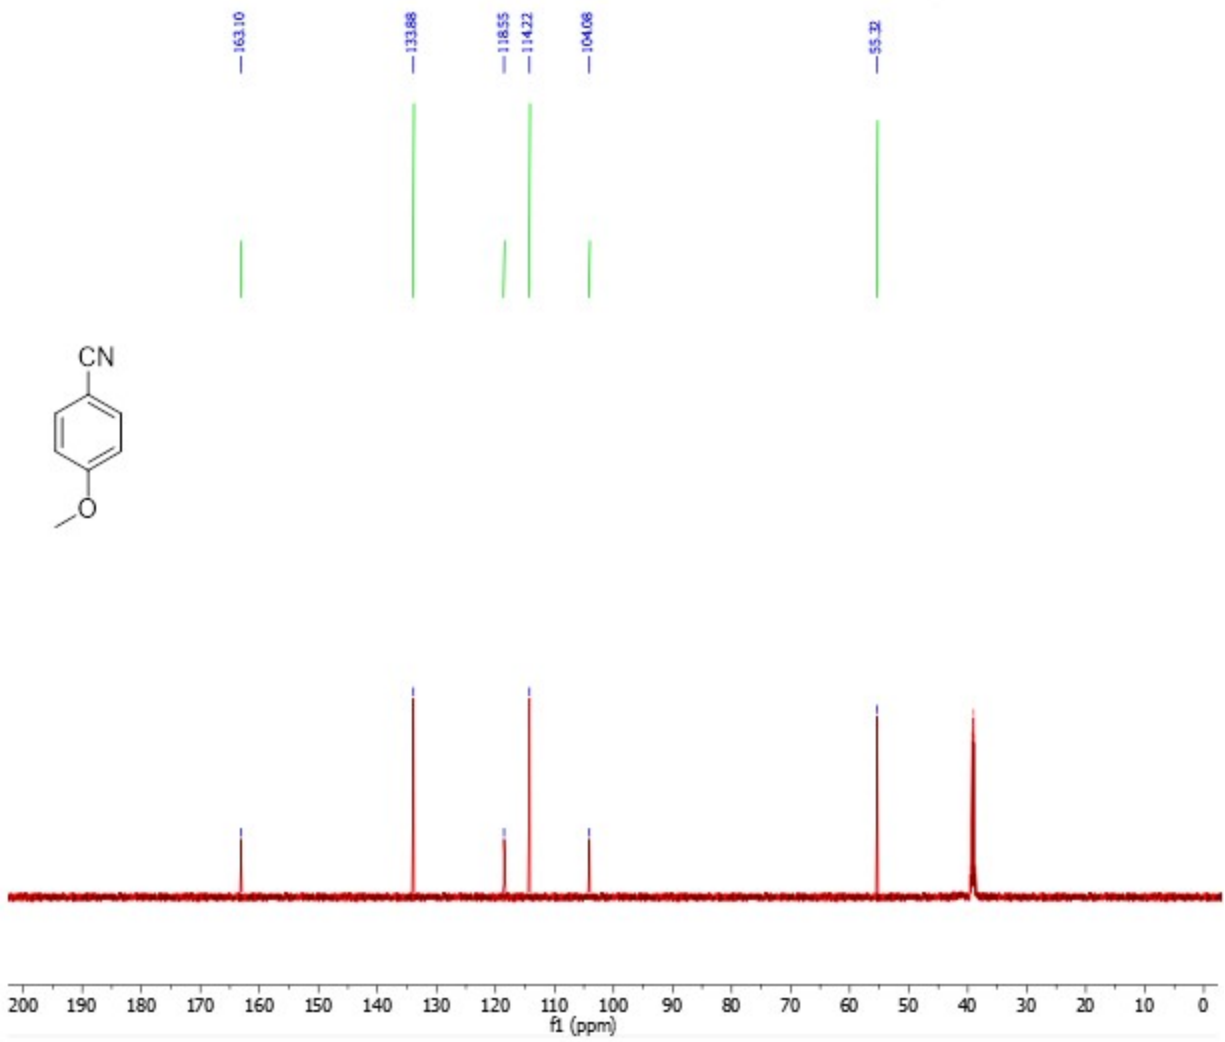

**References:**

Han, Min Su; Jang, Mingyeong; Lim, Taeho; Park, Byoung Yong, *Journal of Organic Chemistry*, 2022, 87, 910 – 919.

Xu, Da Peng; Xiong, Meilu; Kazem nejadi, Milad, *RSC Advances*, 2021, 11, 21, 12484 – 12499.

Dighe, Shashikant U.; Chowdhury, Deepan; Batra, Sanjay, *Advanced Synthesis and Catalysis*, 2014, 356, 3892 – 3896.

Shimojo, Hiroyuki; Moriyama, Katsuhiko; Togo, Hideo, *Synthesis*, 2013, 45, 2164.
